# Supplementary material
Source: Research Square preprint supplement (doi:10.21203/rs.3.rs-8982904/v1)
Supplement: Supplementary file 2 [file c8c38a493d1450d1ff5265a7.docx]

**Geriatrics Post-Series Survey**

**老年病学系列课程后调查**

The Extension for Community Health Outcomes (ECHO) is an innovative initiative to provide additional training for primary care providers and interdisciplinary care teams in the diagnosis and management of geriatric conditions and syndromes via regularly scheduled video conferences.

社区健康成果扩展 (ECHO) 是一项创新举措，旨在通过定期安排的视频会议，为初级保健提供者和跨学科护理团队提供老年疾病和综合症诊断和管理方面的额外培训。

We are conducting a study to evaluate the impact of ECHO-Chicago and invite ECHO-Chicago participants to complete a brief survey. The survey consists of three parts: 1) general questions about your practice in caring for older adults 2) self-efficacy in managing older adult patients and, 3) resources you use for more information about care of aging patients. Participation in this study is voluntary. The survey will take about 20 minutes to complete. By completing the survey you are indicating your consent to participate in the study.

我们正在进行一项研究，以评估 ECHO-Chicago 的影响，并邀请 ECHO-Chicago 参与者完成一项简短的调查。该调查由三个部分组成：1) 关于您护理老年人实践的一般问题；2) 管理老年患者的自我效能感；3) 您用于获取有关老年患者护理更多信息的资源。参与本研究是自愿的。完成调查大约需要 20 分钟。完成调查即表示您同意参与该研究。

You will be asked to complete the survey prior to and immediately following completion of the ECHO-Chicago Geriatrics series. We will compare results from the pre- and post- intervention surveys in order to determine if there are changes as a result of participation in ECHO-Chicago. You will be assigned a unique identifier that allows us to match your pre and post survey results. The ECHO-Chicago Project Coordinator is the only member of the project team with access to information that links you to your unique identifier. This information will not be shared with any other members of the ECHO-Chicago team. The results of the surveys will be reported in aggregate; health center data and individual responses will not be shared with anyone. Only the unique identifier will be recorded in the data set.

您将被要求在完成 ECHO-Chicago 老年医学系列课程之前和之后立即完成调查。我们将比较干预前和干预后的调查结果，以确定参与 ECHO-Chicago 是否会带来变化。您将被分配一个唯一的标识符，使我们能够匹配您的课程前调查和课程后调查的结果。ECHO-Chicago 项目协调员是项目团队唯一可以访问与您的唯一标识符相关联信息的成员。此信息不会与 ECHO-Chicago 团队的任何其他成员分享。调查结果将以汇总形式报告；健康中心的数据和个人的回答不会与任何人分享。只有唯一标识符将记录在数据集中。

Please contact the ECHO-Chicago Project Director, Dr. Daniel Johnson at 773-834-0497 or hnson@peds.bsd.uchicago.edu, or the ECHO-Chicago Director of Operations, Kanika Mittal at 773-702-2213 or kmittal@peds.bsd.uchicago.edu if you have any questions.

如果您有任何疑问，请联系 ECHO-Chicago 项目总监 Daniel Johnson 博士（电话 773-834-0497，电子邮件：djohnson@peds.bsd.uchicago.edu）或 ECHO-Chicago 运营总监 Kanika Mittal（电话 773-702-2213，电子邮件：kmittal@peds.bsd.uchicago.edu）。

| **Now that you have participated in the ECHO-Chicago Geriatrics series, what were the benefits of participating?**  **现在您已经参加了 ECHO-Chicago 老年病学系列课程，参加的好处是什么？**  **Please rate the following benefits that apply to you.**  **请评价以下适用于您的好处。** | | | | | | | | | | | |
| --- | --- | --- | --- | --- | --- | --- | --- | --- | --- | --- | --- |
|  | Not a benefit  不是好处 | | | Minor benefit  小的好处 | | Moderate benefit  中等好处 | | Major benefit  大的好处 | | Maximum benefit  最大好处 | |
| Enhanced knowledge about diagnosis, treatment and management of geriatric conditions and syndromes.  增强有关老年疾病和综合征的诊断、治疗和管理的知识。 |  | | |  | |  | |  | |  | |
| Increased collaboration with specialists.  加强与专家的合作。 |  | | |  | |  | |  | |  | |
| CME credit.  获得继续医学教育 (CME) 的学分。 |  | | |  | |  | |  | |  | |
| Provide direct care to patients and reduce the need for referrals to subspecialty care.  为患者提供直接护理并减少转诊至亚专科护理的需要。 |  | | |  | |  | |  | |  | |
| Reduce overall cost of care.  降低总体护理成本。 |  | | |  | |  | |  | |  | |
| Collegial discussions with peers about geriatric patients.  与同行就老年患者进行集体讨论。 |  | | |  | |  | |  | |  | |
| Achieving competence in caring for geriatric patients.  获得护理老年患者的能力。 |  | | |  | |  | |  | |  | |
| Self-efficacy: Belief in my ability to effectively manage and treat older adult patients.  自我效能感：相信我有能力有效管理和治疗老年患者。 |  | | |  | |  | |  | |  | |
| Other, please specify.  其他，请注明。 |  | | |  | |  | |  | |  | |
| **How often do you perform the following when seeing geriatric patients?**  **在给老年患者看病时，您多久执行一次以下操作？** | | | | | | | | | | | |
|  | | Never  从不 | Rarely  很少 | | Sometimes  有时 | | Often  经常 | | Most of the time  大多数时候 | | N/A  不适用 |
| Use a prognostic tool to estimate remaining life expectancy.  使用预测工具来估计剩余的预期寿命。 | |  |  | |  | |  | |  | |  |
| Screen for cognitive impairment.  筛查认知障碍。 | |  |  | |  | |  | |  | |  |
| Assess for caregiver burden.  评估看护者的负担。 | |  |  | |  | |  | |  | |  |
| Perform a complete medication review/reconciliation.  进行完整的药物审查/核对。 | |  |  | |  | |  | |  | |  |
| Discontinue high risk medications in older adults.  让老年人停止服用高风险药物。 | |  |  | |  | |  | |  | |  |
| Discuss or complete advance directives (power of attorney or living will).  讨论或完成预先指示（授权书或生前遗嘱）。 | |  |  | |  | |  | |  | |  |
| Discuss palliative care or hospice.  讨论姑息治疗或临终关怀。 | |  |  | |  | |  | |  | |  |
| Recommend specific community resources for older adults.  为老年人推荐特定的社区资源。 | |  |  | |  | |  | |  | |  |
| Screen for falls.  筛查跌倒风险。 | |  |  | |  | |  | |  | |  |
| Adjust disease specific targets (A1c, blood pressure goals) based on patient preferences.  根据患者偏好调整疾病特定目标（A1c、血压目标）。 | |  |  | |  | |  | |  | |  |
| Adjust disease specific targets based on presence of multimorbidity.  根据多重发病率的存在调整疾病的具体目标。 | |  |  | |  | |  | |  | |  |

| **Please rate your knowledge, skills and/or competencies in the following areas.**  **请评价您在以下领域的知识、技能和/或能力。**  **Please select a number to rate yourselves on a seven-point scale:**  **请选择一个数字，在七分制的量表中给自己进行评分：**  **1 = none or no skill at all 没有或根本没有技能**  **2 = vague knowledge, skills, or competence 知识、技能或能力不明确**  **3 = slight knowledge, skills or competence 知识、技能或能力有限**  **4 = average among my peers 与同龄人相比属于平均水平**  **5 = competent 胜任**  **6 = very competent 非常有能力**  **7 = expert, teach others 专家，教导他人** | | | | | | | |
| --- | --- | --- | --- | --- | --- | --- | --- |
|  | 1 | 2 | 3 | 4 | 5 | 6 | 7 |
| Ability to estimate remaining life expectancy in older adults.  能够估计老年人的剩余预期寿命。 |  |  |  |  |  |  |  |
| Ability to screen for cognitive impairment in older adults.  能够筛查老年人的认知障碍。 |  |  |  |  |  |  |  |
| Ability to diagnose dementia using DSM-V criteria.  能够使用 DSM-V 标准来诊断痴呆症。 |  |  |  |  |  |  |  |
| Overall ability to treat patients with dementia.  治疗痴呆症患者的总体能力。 |  |  |  |  |  |  |  |
| Ability to perform a complete medication review/reconciliation.  能够执行完整的药物审查/协调。 |  |  |  |  |  |  |  |
| Ability to identify high risk medications for older adults.  能够识别老年人的高风险药物。 |  |  |  |  |  |  |  |
| Ability to discuss and complete health care power of attorney documentation.  能够讨论并完成医疗保健授权书文件。 |  |  |  |  |  |  |  |
| Ability to discuss and complete living will documentation/POLST.  能够讨论并完成生前遗嘱文件/维持生命治疗医嘱 (POLST)。 |  |  |  |  |  |  |  |
| Ability to education patients about hospice and palliative medicine.  能够对患者进行临终关怀和姑息医学教育。 |  |  |  |  |  |  |  |
| Ability to recommend community-based resources for older adults.  能够为老年人推荐基于社区的资源。 |  |  |  |  |  |  |  |
| Ability to educate clinic staff about older adults.  能够对诊所工作人员进行有关老年人的教育。 |  |  |  |  |  |  |  |
| Ability to assess and manage co-morbidities in older adults.  能够评估和管理老年人的合并症。 |  |  |  |  |  |  |  |
| Ability to serve as a consultant within my clinic for geriatric questions and issues.  能够在我的诊所担任顾问，解决老年问题。 |  |  |  |  |  |  |  |
| Ability to screen for and treat falls.  能够筛查和治疗跌倒。 |  |  |  |  |  |  |  |
| Ability to appropriately adjust disease specific targets in patients with multimorbidity.  能够适当调整患有多种疾病的患者的疾病特定目标。 |  |  |  |  |  |  |  |

| **Now, we would like to ask you a few questions about your experience participating in ECHO-Chicago. Thanking about the series, please rate each statement below according to the scale at the right.**  **现在，我们想问您一些有关您参加 ECHO-Chicago 的经历的问题。回忆一下该系列课程，请通过右侧的评级对下面的每项陈述进行评分。** | | | | | |
| --- | --- | --- | --- | --- | --- |
|  | Poor  差 | Fair  还行 | Good  好 | Very Good  很好 | Excellent  极好 |
| Stated objectives were met: Educate community-based Chicago healthcare providers in treatment and management of older adults.  已实现既定目标：在老年人治疗和管理方面对芝加哥社区医疗保健提供者进行教育。 |  |  |  |  |  |
| Stated objectives were met: Inform participants of changes in best practices in older adult care.  已实现既定目标：告知参与者老年人护理最佳实践的变化。 |  |  |  |  |  |
| Stated objectives were met: Expand patient access to older adult care expertise in Chicago communities.  已实现既定目标：扩大芝加哥社区患者获得老年人护理专业知识的机会。 |  |  |  |  |  |
| Content was evidence-based, balanced, and objective.  内容基于证据、平衡且客观。 |  |  |  |  |  |
| I had opportunities to ask questions.  我有机会提问。 |  |  |  |  |  |
| The sessions were well-paced.  课程节奏顺利。 |  |  |  |  |  |
| The sessions were well-organized.  课程组织得很好。 |  |  |  |  |  |
| The presenter communicated clearly  主讲人沟通清楚 |  |  |  |  |  |
| The presentations were useful to me for my practice.  这些演讲对我的实践很有用。 |  |  |  |  |  |
| Feedback provided on case presentations was useful.  对案例演示提供的反馈很有用。 |  |  |  |  |  |

**Was the activity fair, balanced and free of commercial bias?**

**该活动是否公平、平衡且没有商业偏见？**

- Yes 是
- No 否

**If No, please provide additional comment (please be as specific as possible):**

**如果回答否，请提供补充评论（请尽可能具体）：**

| **What did you like about the series?**  **您喜欢这个系列课程的什么地方？**  **Please rank the following items according to the scale on the right, with 5 being liked most.**  **请通过右边的评级对以下项目进行排序，5 表示最喜欢。** | | | | | |
| --- | --- | --- | --- | --- | --- |
|  | 1  Liked  Least  最不喜欢 | 2 | 3 | 4 | 5  Liked most  最喜欢 |
| Presentations by Geriatrics.  老年病学方面的演讲。 |  |  |  |  |  |
| Discussions with other community providers.  与其他社区服务提供商的讨论。 |  |  |  |  |  |
| Opportunities to present patient cases.  展示患者病例的机会。 |  |  |  |  |  |
| Opportunities to learn with a subspecialist.  与专科医生一起学习的机会。 |  |  |  |  |  |
| Meeting colleagues from other health centers.  会见来自其他健康中心的同事。 |  |  |  |  |  |
| Other, please specify:  其他，请说明： |  |  |  |  |  |

**How can we improve this series?**

**我们如何才能改进这个系列？**

**Now that you have participated in ECHO-Chicago, do you feel part of a knowledge network where you can consult experts at academic centers and colleagues at other health clinics?**

**既然您已经参加了 ECHO-Chicago，您是否感觉自己加入到了知识网络中，让您可以在其中咨询学术中心的专家和其他健康诊所的同事？**

- Yes 是
- No 否

**Has participation in ECHO-Chicago increased your collegiality with primary care providers from other health clinics?**

**参加 ECHO-Chicago 是否强化了您与其他健康诊所初级保健提供者的合作关系？**

- Yes 是
- No 否

**What changes have you made in your practice based on what you learned in the ECHO-Chicago series?**

**根据您在 ECHO-Chicago 系列课程中学到的知识，您在实践中做出了哪些改变？**

| **What are the barriers you have encountered in making or not making changes at your health center?**  **在您的医疗中心做出（或不做出）改变时，您遇到的障碍是什么?** | | | | | |
| --- | --- | --- | --- | --- | --- |
|  | Not a barrier  不是障碍 | Minor barrier  小障碍 | Moderate barrier  中等障碍 | Major barrier  主要障碍 | Maximum barrier  最大障碍 |
| Lack of training on geriatrics-specific management and treatment issues.  缺乏有关老年医学具体管理和治疗问题方面的培训。 |  |  |  |  |  |
| Lack of training on palliative medicine and hospice.  缺乏姑息医学和临终关怀方面的培训。 |  |  |  |  |  |
| Lack of confidence in ability to diagnose dementia.  对诊断痴呆症的能力缺乏信心。 |  |  |  |  |  |
| Lack of confidence in ability to manage dementia.  对治疗痴呆症的能力缺乏信心。 |  |  |  |  |  |
| Lack of staff training in geriatrics.  缺乏老年医学方面的员工培训。 |  |  |  |  |  |
| Time pressures of caring for complex geriatric patients.  护理复杂老年患者的时间压力。 |  |  |  |  |  |
| Staff available to assist with social support needs of older adults.  工作人员是否有能力协助老年人的社会支持需求。 |  |  |  |  |  |

**ECHO-Chicago series provide advanced training for primary care health professionals in the diagnosis and management of common, chronic diseases. Please list any additional disease areas that you would like to see in an ECHO-Chicago series.**

**ECHO-Chicago 系列课程为初级保健专业人员提供常见慢性疾病诊断和管理方面的高级培训。请列出您希望在 ECHO-Chicago 系列课程中看到的任何其他疾病领域。**
